# Supplementary material
Source: Springer Nature journal article supplement (https://www.springermedizin.de/resource/supplementary/13058_2013_3369_MOESM15_ESM.pdf/9703970)

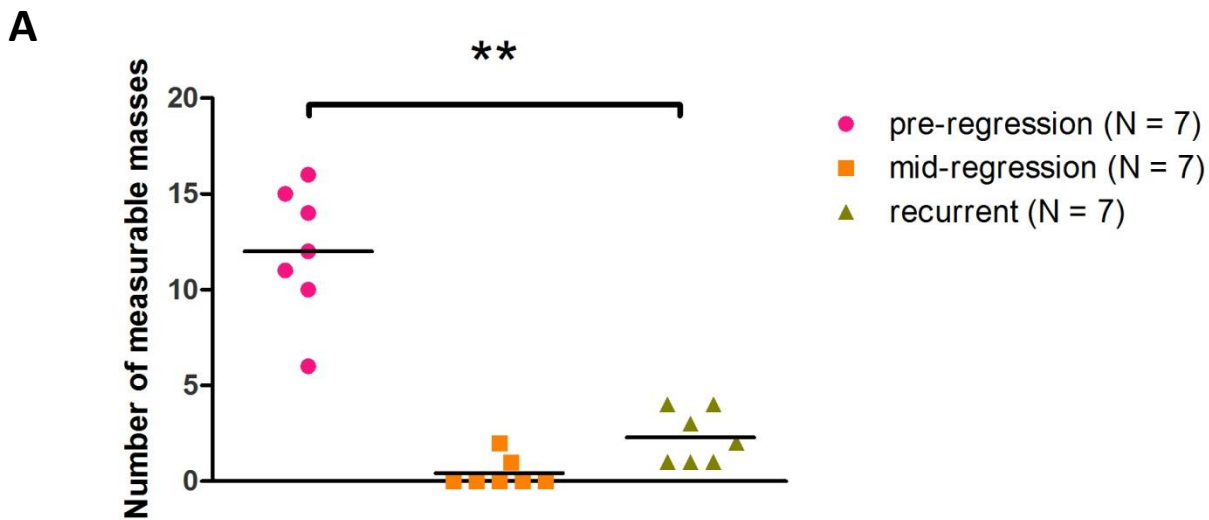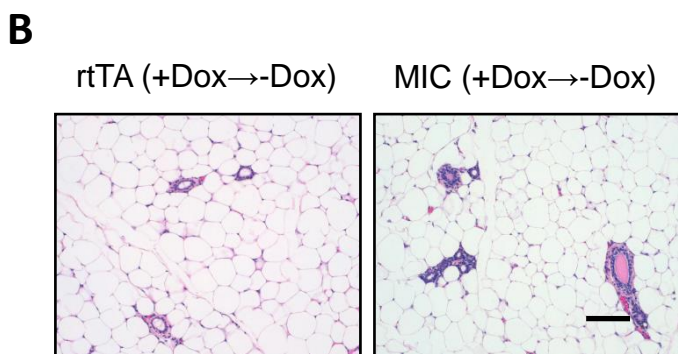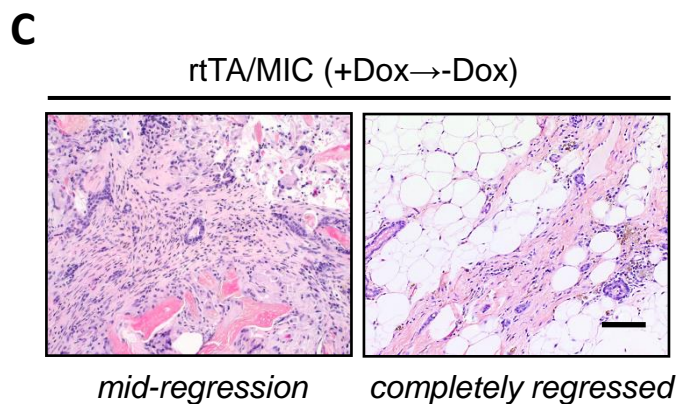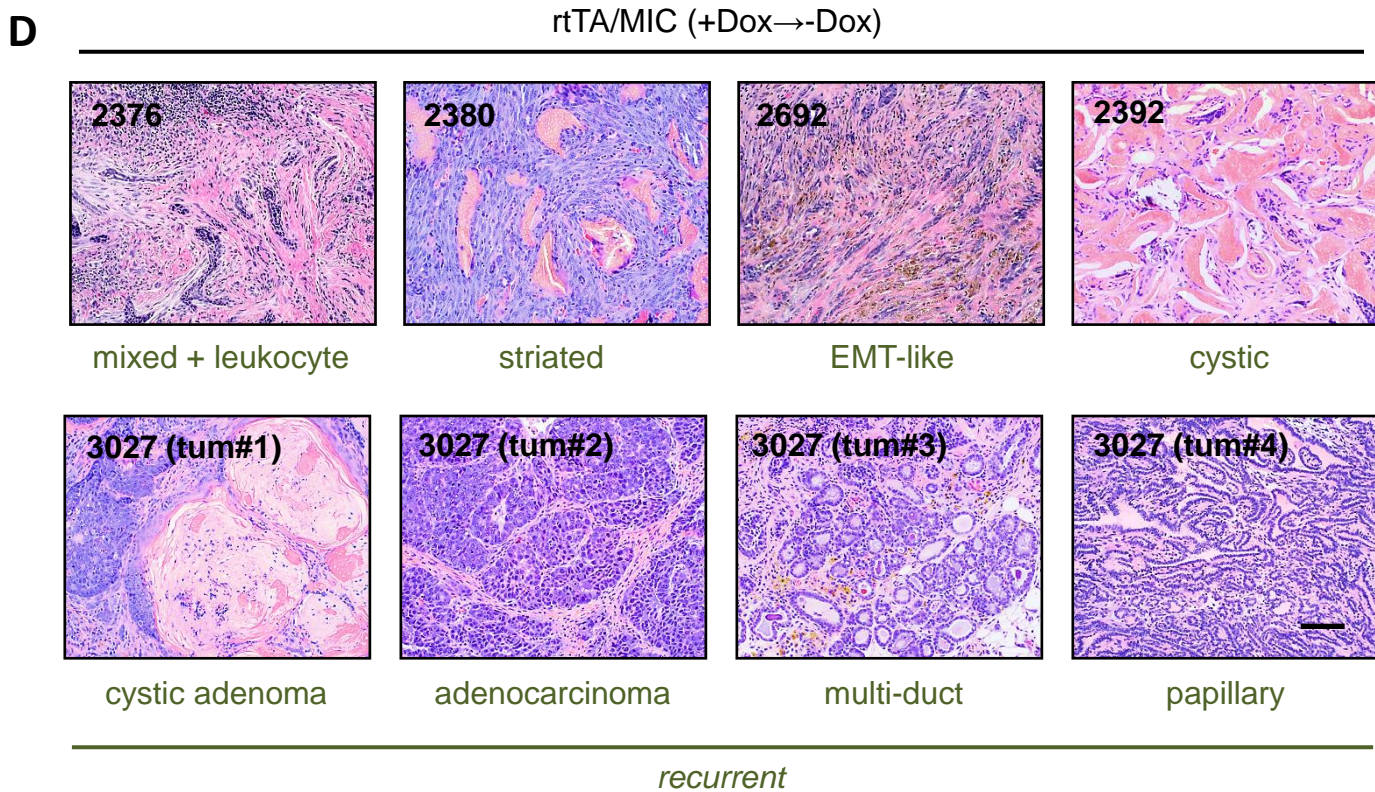

Supplement: MOESM15 [file 9703970]
